# Supplementary material for: “I Genuinely Believe This Is the Most Stigmatised Group within the Social Care Sector.” Health and Social Care Professionals Experiences of Dealing with People with Alcohol Related Brain Damage: A Qualitative Interview Study
Source: Preprints.org preprint supplement (doi:10.20944/preprints202311.0984.v1), 2023-11-15
Supplement: Supplementary file 1 [file supplementary]

# Supplementary Materials (Text S1)

## Topic Guide

### Introductory Questions

- Could you explain what this institution does?
- Could you explain what your role entails?

### Topics

- What can you tell me about Alcohol Related Brain Damage?
  - Diagnosis?
  - Symptoms?
- Do you encounter people with this diagnosis?
  - What is your experience with this diagnosis?
  - Have you made an ARBD diagnosis?
  - If you have made such a diagnosis how often was this?
- Can you tell me more about the care and treatment a person with this diagnosis?
  - Do you provide this care/treatment?
  - Where can you refer this person to?
  - Do you know any other organisations that work with this diagnosis?
- Do you enquire about a patient's alcohol use?
  - Why/why not?
  - What is done with this information?
- Sum up what has been discussed.
  - Is there anything important to you we haven't mentioned?
  - If you want to follow up on any issues you have talked about, I would like to refer you to the debrief-sheet.
